# Supplementary material for: microRNA165 and 166 modulate response of the Arabidopsis root apical meristem to salt stress
Source: PubMed Central journal article supplement (PMC10421904; doi:10.1038/s42003-023-05201-6), 2023-08-11
Supplement: 42003_2023_5201_MOESM3_ESM.pdf [file 42003_2023_5201_MOESM3_ESM.pdf]

## **Description of Additional Supplementary Files**

**File name:** Supplementary Data

**Description:** The source data behind the graphs in the paper.
